# Supplementary material for: Drivers and CO 2 flux budgets in a Sahelian Faidherbia albida agro-silvo-pastoral parkland: Insights from continuous high-frequency soil chamber measurements and Eddy Covariance
Source: Copernicus journal article supplement (doi:10.5194/egusphere-2025-2660), 2025-07-16
Supplement: Supplementary file 1 [file egusphere-2025-2660-supplement.pdf]

# Supplementary materials:

## Supplement S1:

Table S1.1: data description

| Parameters                                                     | Symbol              | Unit                                                | Method                             | Sensor                   | Data processing                     | Measurement height (m) |
|----------------------------------------------------------------|---------------------|-----------------------------------------------------|------------------------------------|--------------------------|-------------------------------------|------------------------|
| Volumetric water Content                                       | VWC                 | %                                                   | TOMST                              | TMS-4                    | native                              | -0.06                  |
| Air temperature                                                | T <sub>air</sub>    | °C                                                  | TOMST                              | TMS-4                    | native                              | 0.15                   |
| Soil temperature                                               | T <sub>soil</sub>   | °C                                                  | TOMST                              | TMS-4                    | native                              | -0.06                  |
| Crop + Weed LAI                                                | LAI.field           | m <sup>-2</sup> leaf m <sup>-2</sup> soil           | NDVI                               | Pontailier et al. (2003) | -                                   | 18                     |
| Chamber Leaf Area Index                                        | LAIch               | m <sup>-2</sup> leaf m <sup>-2</sup> soil           | Manual, from leaflet count and SLA | -                        | -                                   | crop level             |
| Soil + crop net CO <sub>2</sub> fluxes in chambers, gap-filled | FCO <sub>2</sub> ch | g C-CO <sub>2</sub> m <sup>-2</sup> d <sup>-1</sup> | Chambers                           | Picarro G2508            | native time series, then gap-filled | 0.5                    |
| Soil + crop respiration in chambers, gap-filled                | Rch                 | g C-CO <sub>2</sub> m <sup>-2</sup> d <sup>-1</sup> | Chambers                           | Picarro G2508            | Computed, Lloyd and Taylor (1994)   | 0.5                    |

| Parameters                                                                     | Symbol  | Unit                                            | Method           | Sensor        | Data processing                           | Measurement height (m) |
|--------------------------------------------------------------------------------|---------|-------------------------------------------------|------------------|---------------|-------------------------------------------|------------------------|
| Crop Gross Primary Productivity in chambers, standardised with LAI, gap-filled | GPPch   | $\text{g C-CO}_2 \text{ m}^{-2} \text{ d}^{-1}$ | Chambers         | Picarro G2508 | Computed, Lasslop et al. (2010)           | 0.5                    |
| Global Radiation                                                               | Rg      | $\text{W m}^{-2}$                               | Skye Instruments |               | Computed from PAR                         | 20                     |
| Ecosystem respiration, gap-filled                                              | Reco.EC | $\text{g C-CO}_2 \text{ m}^2 \text{ d}^{-1}$    | EC               | Smartflux     | Computed ReddyProc, Lasslop et al. (2010) | 20                     |
| Gross Primary Productivity, gap-filled                                         | GPP.EC  | $\text{g C-CO}_2 \text{ m}^2 \text{ d}^{-1}$    | EC               | Smartflux     | Computed ReddyProc, Lasslop et al. (2010) | 20                     |
| Net Ecosystem Exchange, gap-filled                                             | NEE.EC  | $\text{g C-CO}_2 \text{ m}^2 \text{ d}^{-1}$    | EC               | Smartflux     | Computed ReddyProc, Lasslop et al. (2010) | 20                     |

Supplement S2:

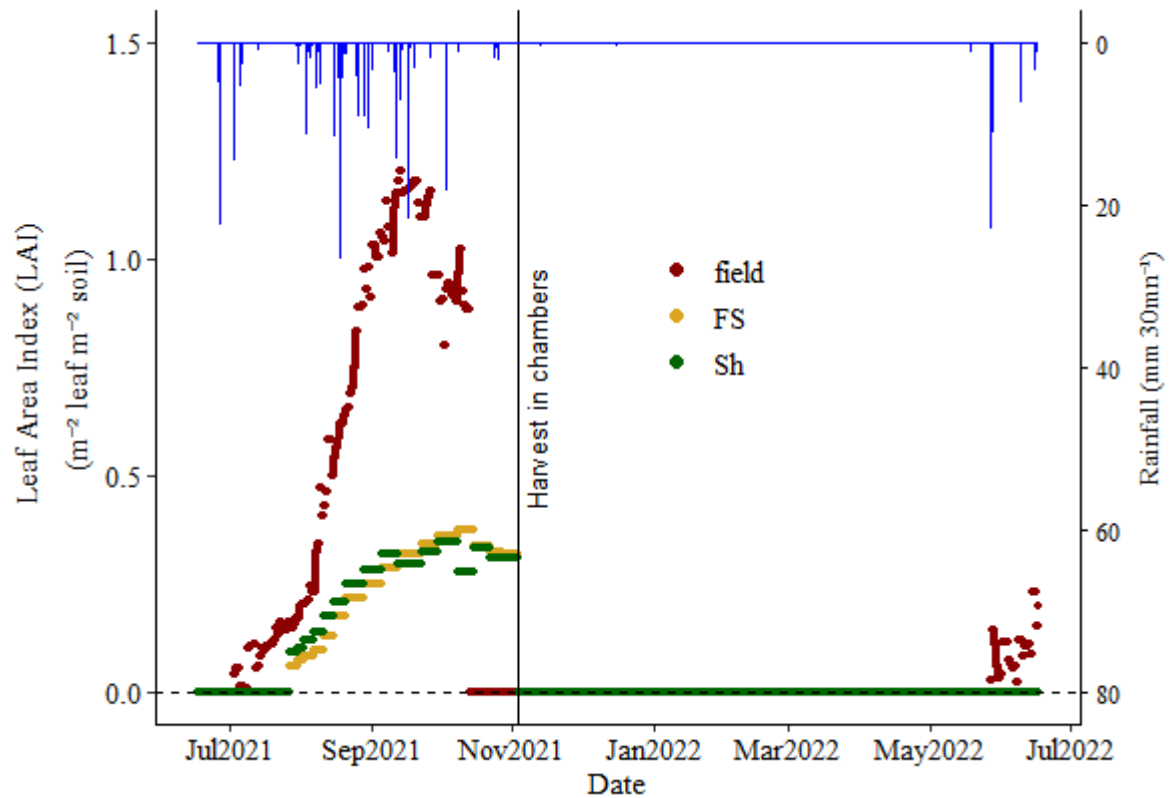

Fig. S2.1: Dynamics of Leaf Area Index (LAI).

The red points represent the crop LAI for the entire field ( $LAI_{field} = LAI_{Groundnut} + LAI_{Weed} + LAI_{Cowpea}$ ). Yellow and green points indicate the average of LAI within full-sun and shaded chambers, respectively ( $LAI_{ch} = LAI_{of\ groundnut\ only}$ ). The blue line shows half-hourly rainfall, while the vertical solid black line marks the groundnut harvest within the chambers.

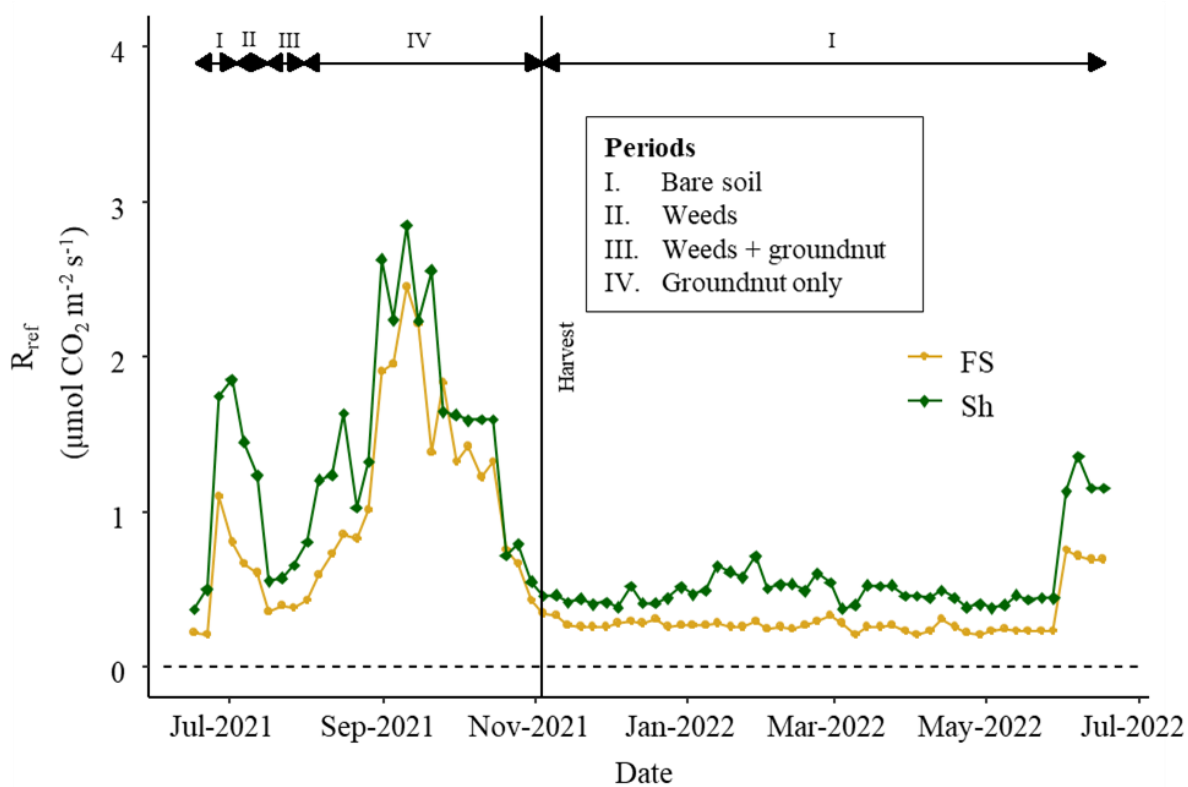

Fig. S2.2: Seasonal dynamics of the adjusted reference respiration ( $R_{ref}$ , Eq.4), a model parameter for respiration

Yellow and green lines indicate the adjusted reference respiration in full-sun and shaded chambers, respectively, while the vertical solid black line shows the groundnut harvest period within the chambers. Roman numerals (above the black arrows) refer to vegetation conditions prevailing inside the chambers: (I) bare soil, (II) weeds, (III) weeds + groundnuts, and (IV) groundnuts only.

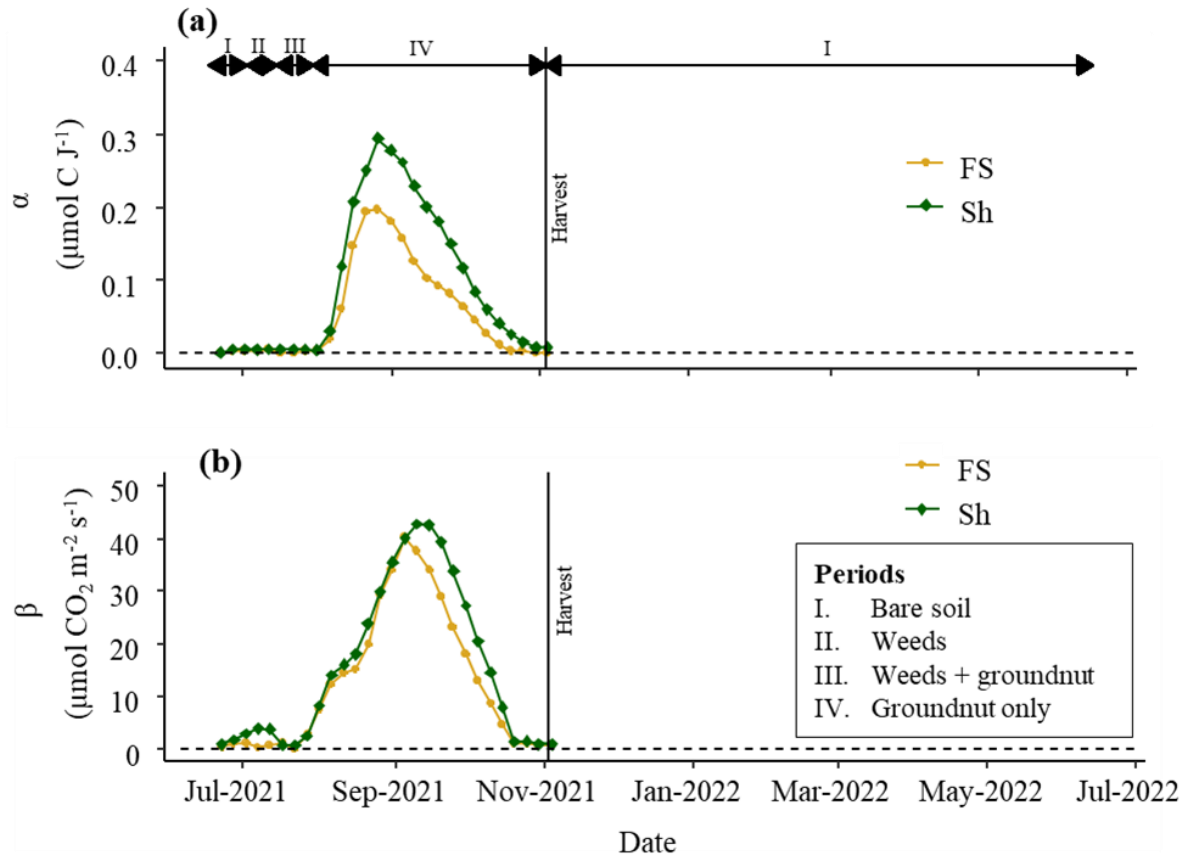

Fig. S2.3: Seasonal dynamics of GPPch model parameters (Eq.6)

(a) the light use efficiency ( $\alpha$ ) in full-sun (yellow line, FS) and shaded chambers (green line, Sh), and (b) the maximum  $\text{CO}_2$  uptake rate at light saturation  $\beta$  represented by the yellow and green lines for full-sun (FS) and shaded chambers (Sh), respectively; vertical solid black line indicates the harvest period within the chambers. Roman numerals (above the black arrows) refer to vegetation conditions prevailing inside the chambers: (I) bare soil, (II) weeds, (III) weeds + groundnuts, and (IV) groundnuts only.

Table S2.1: Comparison of the Rch model parameter ( $R_{\text{ref}}$ ) and GPPch model parameters ( $\alpha$  and  $\beta$ ) between the Full sun (FS) and Shaded (Sh) chambers.

|                                                                            | Mean $\pm$ SD   | Min   | Max  | Mann-Whitney test |
|----------------------------------------------------------------------------|-----------------|-------|------|-------------------|
| <b>R<sub>ref</sub> (μmol CO<sub>2</sub> m<sup>-2</sup> s<sup>-1</sup>)</b> |                 |       |      |                   |
| FS                                                                         | 0.6 $\pm$ 0.5   | 0.2   | 2.5  | *                 |
| Sh                                                                         | 0.9 $\pm$ 0.6   | 0.4   | 2.9  |                   |
| <b>α (μmol CO<sub>2</sub> J<sup>-1</sup>)</b>                              |                 |       |      |                   |
| FS                                                                         | 0.06 $\pm$ 0.07 | <0.01 | 0.2  | *                 |
| Sh                                                                         | 0.1 $\pm$ 0.1   | <0.01 | 0.3  |                   |
| <b>β (μmol CO<sub>2</sub> m<sup>-2</sup> s<sup>-1</sup>)</b>               |                 |       |      |                   |
| FS                                                                         | 13.4 $\pm$ 13.2 | <0.01 | 40.2 | *                 |
| Sh                                                                         | 16.6 $\pm$ 15.0 | 0.5   | 42.8 |                   |

$R_{\text{ref}}$  ( $\mu\text{mol CO}_2 \text{ m}^{-2} \text{ s}^{-1}$ ),  $\alpha$  ( $\mu\text{mol CO}_2 \text{ J}^{-1}$ ), and  $\beta$  ( $\mu\text{mol CO}_2 \text{ m}^{-2} \text{ s}^{-1}$ ) represent, respectively, the reference respiration adjusted according to Lloyd and Taylor (1994) (Eq. 4), the light use efficiency of the plant (Groundnut) inside the chambers, and the maximum  $\text{CO}_2$  uptake rate of the plant (groundnut) at light saturation, both adjusted following Lasslop et al. (2010) (Eq. 6). Mean, SD, Min, and Max denote the mean, standard deviation, minimum, and maximum values, respectively. Asterisks indicate the significance levels (\*p value < 0.05) of the Mann-Whitney test, which assesses differences in means between FS and Sh.

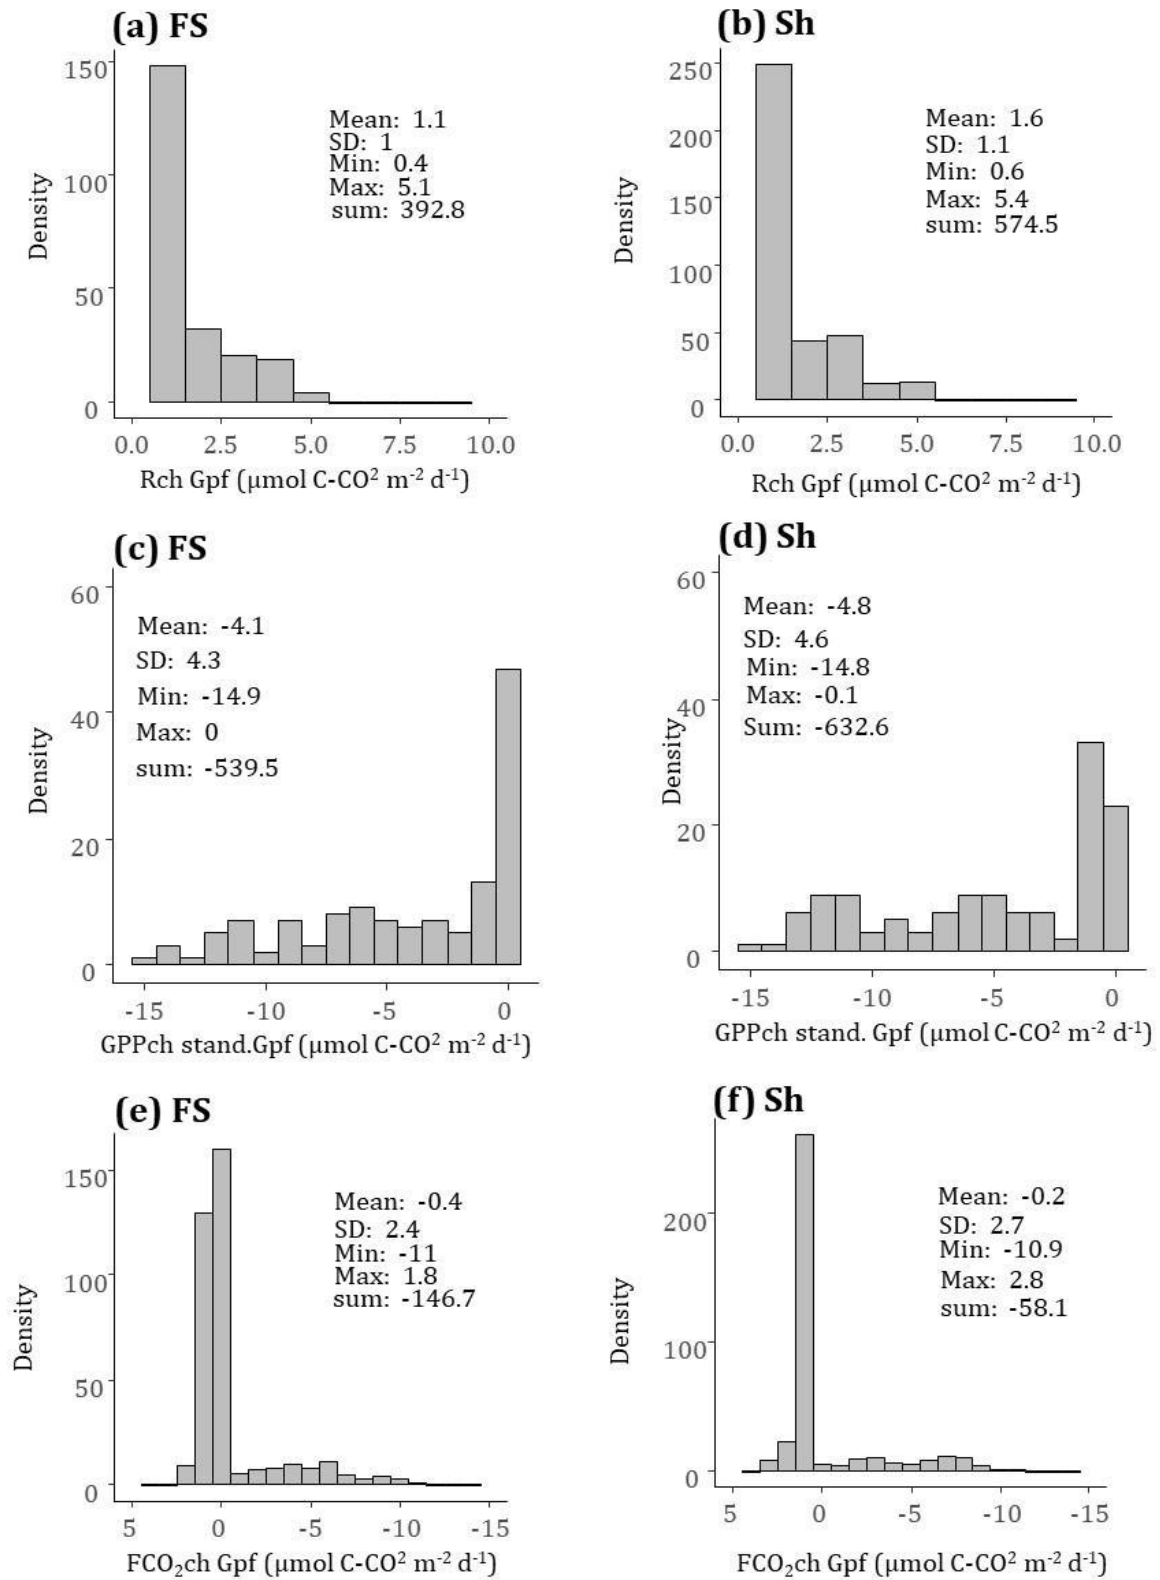

Fig. S2.4: Density distribution of daily cumulative and gap-filled carbon flux components

Rch in (a) FS and (b) Sh, GPPch standardised for LAI in (c) FS and (d) Sh, and FCO<sub>2</sub>ch in (e) FS and (f) Sh; Summary statistics (Mean, SD, Min, Max) are reported at the daily scale ( $\text{g C-CO}_2 \text{ m}^{-2} \text{ d}^{-1}$ ).

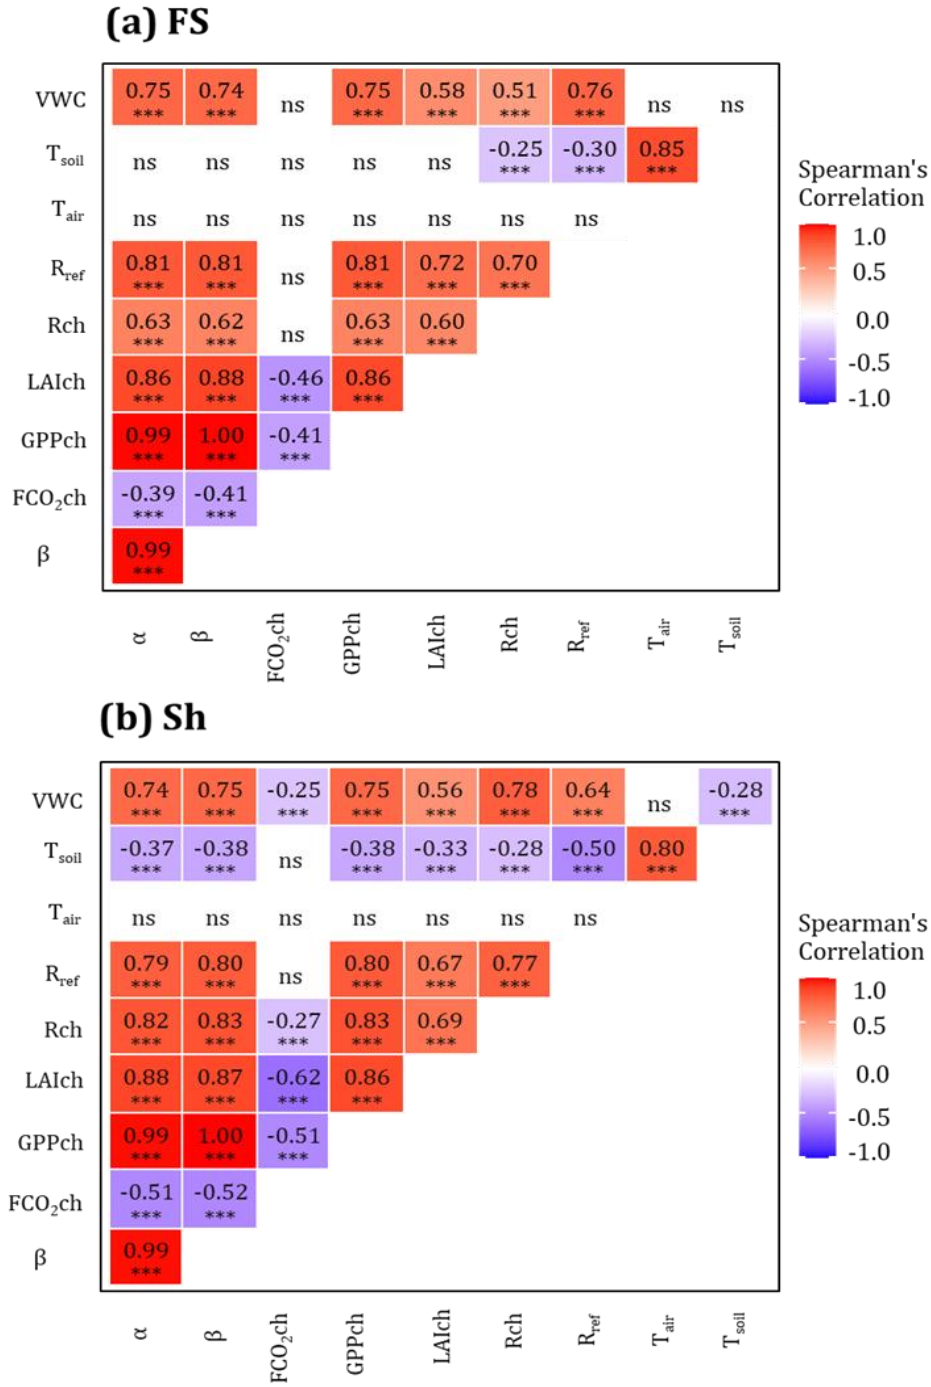

Fig. S2.5: Correlation matrices between daily cumulative CO<sub>2</sub> flux components for chambers (R<sub>ch</sub>, GPPch in absolute terms, and FCO<sub>2</sub>ch, in g C-CO<sub>2</sub> m<sup>-2</sup> d<sup>-1</sup>) and daily mean microclimatic parameters, as well as between R<sub>ref</sub> (Eq.4), α and β (Eq.7).

(a) full-sun chambers (FS) and (b) shaded chambers (Sh). The climatic parameters analyzed include soil temperature at 6 cm depth (T<sub>soil</sub>, °C), air temperature at 15 cm height (T<sub>air</sub>, °C), volumetric water content (VWC, %), and chamber leaf area index (LAIch, m<sup>-2</sup> leaf m<sup>-2</sup> soil). Statistical significance is denoted by (\*\*\*) p<0.001 and ns indicate « non-significant » coefficient.



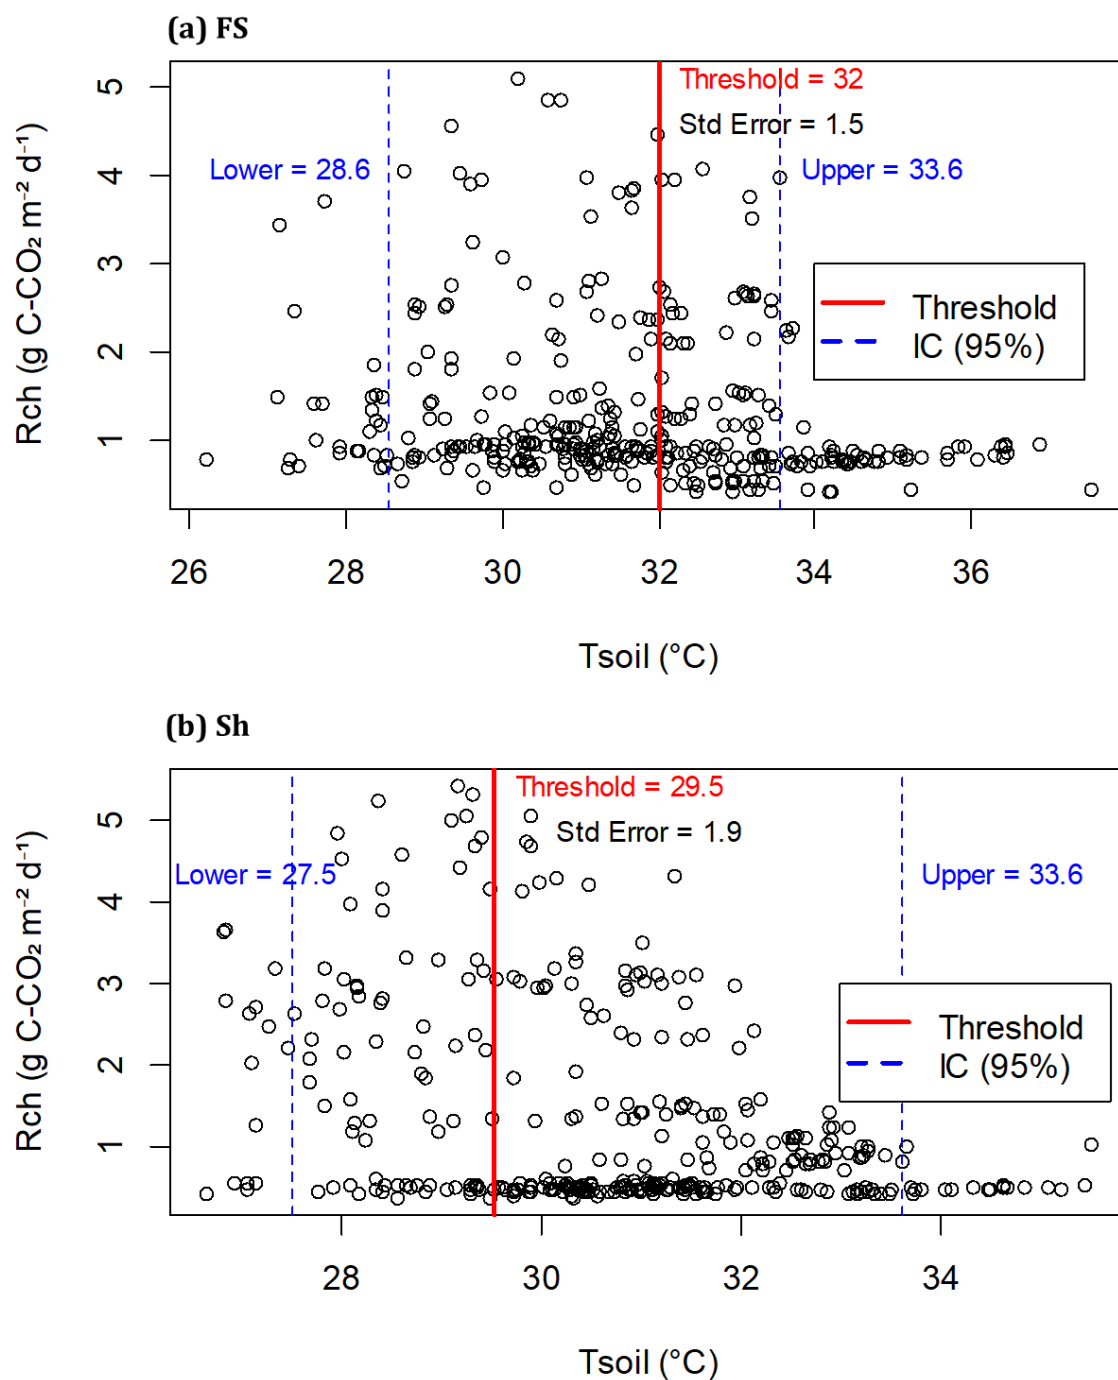

Fig. S2.6: Relationship between daily mean soil temperature ( $T_{\text{soil}}$ , °C) and daily cumulative chamber respiration ( $R_{\text{ch}}$ , g C-CO<sub>2</sub> m<sup>-2</sup> d<sup>-1</sup>).

(a) Full-sun chambers (FS) and (b) shaded chambers (Sh). The red line indicates the threshold at which the slope of the relationship between  $T_{\text{soil}}$  and  $R_{\text{ch}}$  changes significantly. The blue dashed lines represent the 95% confidence interval for the threshold, with lower and upper bounds.

### Supplement S3:

Table S3.1: Comparison of CO<sub>2</sub> fluxes between Ch.stand and EC measurements according to the season.

| Method                 | Flux                      | Wet season (July-Sept):<br>Tree + Groundnut + Cowpea + Weeds                | Dry Season (October-June):<br>Tree + bare soil                                                                                                                                                                           | Full Year<br>(Mg C-CO <sub>2</sub> ha <sup>-1</sup> ) |
|------------------------|---------------------------|-----------------------------------------------------------------------------|--------------------------------------------------------------------------------------------------------------------------------------------------------------------------------------------------------------------------|-------------------------------------------------------|
| EC                     | GPP.EC                    | = GPP Groundnut + GPP weeds + GPP cowpea<br>(1)                             | = GPP tree (5)                                                                                                                                                                                                           | -11.8                                                 |
|                        | Reco.EC                   | = Ra tree AG + Ra tree BG + Ra Groundnut + Ra<br>Weeds + Ra Cowpea + Rh (2) | = Ra tree+Rh = Ra tree AG + Ra tree BG + Rh<br>= Ra tree AG + Rch (6)                                                                                                                                                    | 10                                                    |
|                        | NEE.EC                    | = (1) + (2)                                                                 | = (5) + (6)                                                                                                                                                                                                              | -1.8                                                  |
| Ch.stand<br>(upscaled) | Rch.stand                 | = Ra Groundnut + Ra tree BG + Rh (3)                                        | = Ra tree BG + Rh (7)                                                                                                                                                                                                    | 4.1                                                   |
|                        | GPPch.stand               | = GPP Groundnut + GPP Weeds + GPP Cowpea<br>(4)                             | = 0, no plants in the chambers                                                                                                                                                                                           | -5.5                                                  |
|                        | FCO <sub>2</sub> ch.stand | = (3) + (4)                                                                 | = (7)                                                                                                                                                                                                                    | -1.4                                                  |
| Hypothesis<br>to test  |                           | GPP.EC = GPPch.stand ?                                                      | Reco-EC = Ra tree AG + Rch.stand<br>Ra tree AG = Reco EC - Rch.stand<br><br>Ra tree = $\pm$ Ra tree AG * 1.3<br>CUE = NPP tree / GPP tree<br>CUE = (GPP tree- Ra tree) / GPP tree = <b>0.48 =</b><br><b>ca. 0.5 (8)?</b> |                                                       |

Ra tree AG and Ra tree BG represent the autotrophic respiration from above-ground tree's biomass and below-ground tree's biomass.
